# Supplementary material for: GAGE: generally applicable gene set enrichment for pathway analysis
Source: Springer Nature journal article supplement (doi:10.1186/1471-2105-10-161), 2009-05-27
Supplement: 12859_2008_2891_MOESM3_ESM.pdf [file 12859_2008_2891_MOESM3_ESM.pdf]

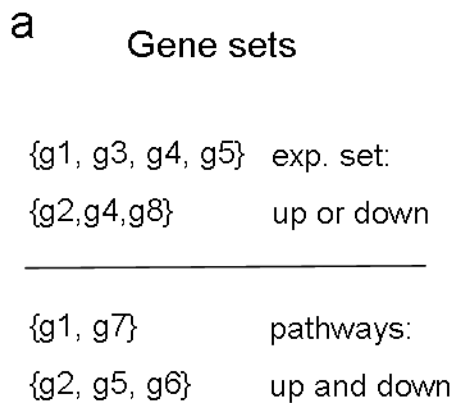

**Microarray data (log based)**

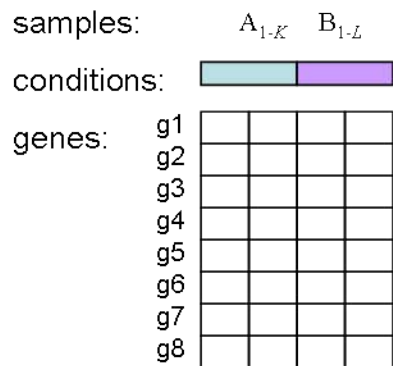

**b**

**1-on-1 comparison**

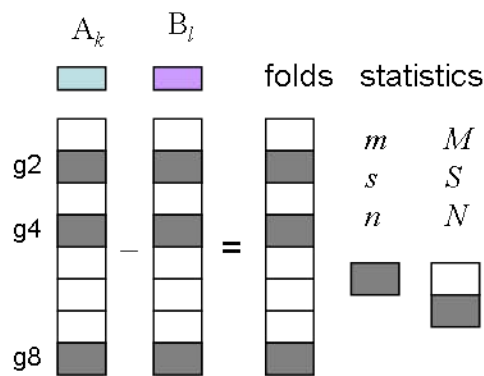

**Two-sample t-test**

$$t_{kl} = (m - M) / \sqrt{s^2 / n + S^2 / n}$$

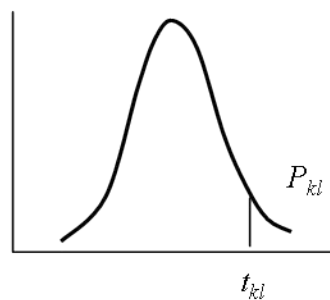

**c**

**Summarization and meta-test**

$$x = -\frac{1}{L} \sum_{kl} \log P_{kl}$$

$$P(X > x) \sim \text{Gamma}(K, 1)$$
